# Supplementary material
Source: PubMed Central journal article supplement (PMC11388856)
Supplement: PBI-14-986-s005.pdf [file PBI-14-986-s005.pdf]

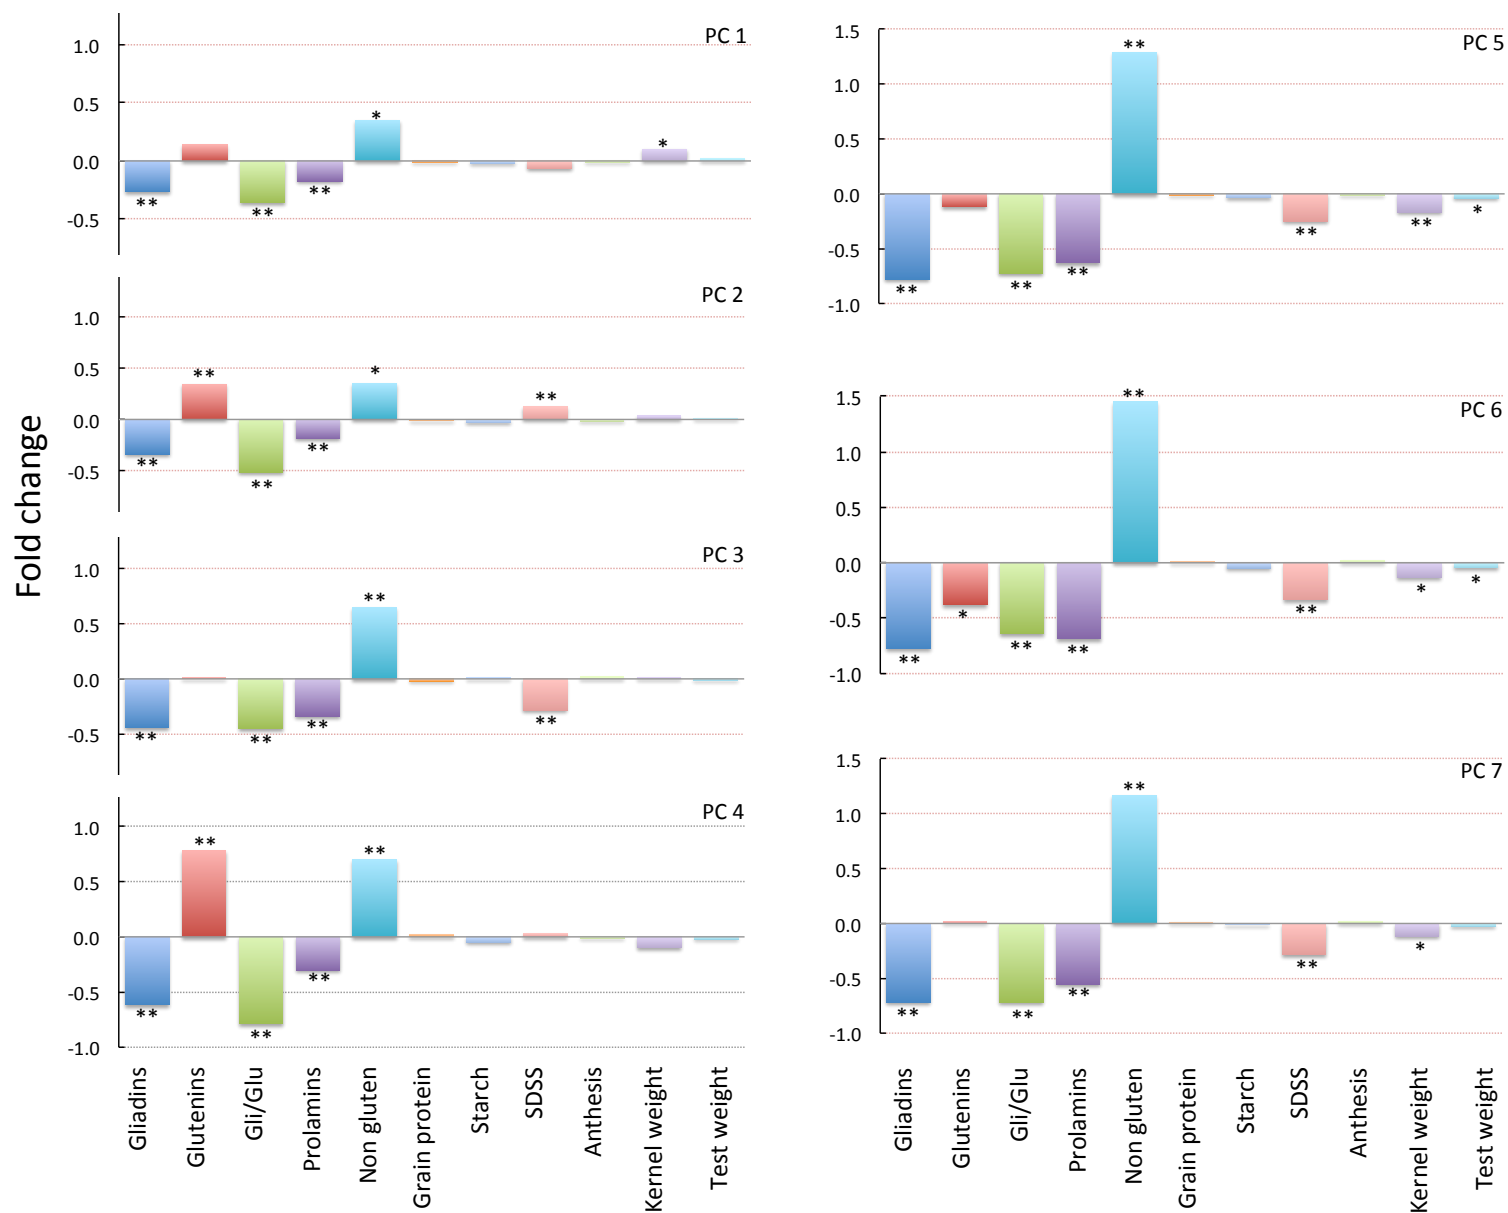

**Figure S2** Fold change in kernel composition and agronomic traits with seven plasmid combinations as described in Figure 1c. The ratio transgenic/wild type (obtained by dividing the value of the transgenic line by the value of the wild-type line) is presented for each parameter. Values above 1 represent higher values in the transgenic than the control, whereas values below 1 represent the opposite. Asterisks over a bar indicate that the transgenic line presents a significantly different value with respect to its corresponding wild type as determined by the LSD all-pairwise comparisons test. Values for individual lines and averages for different plasmid combinations are shown, respectively, in Tables S3 and S4. Significant differences were identified at the 5% (\*) and 1% (\*\*) probability levels by the two-sided Dunnett's multiple comparisons with control (plasmid combination 0). PC, Plasmid Combination.
