# Supplementary material
Source: PubMed Central journal article supplement (PMC11388856)
Supplement: PBI-14-986-s006.pdf [file PBI-14-986-s006.pdf]

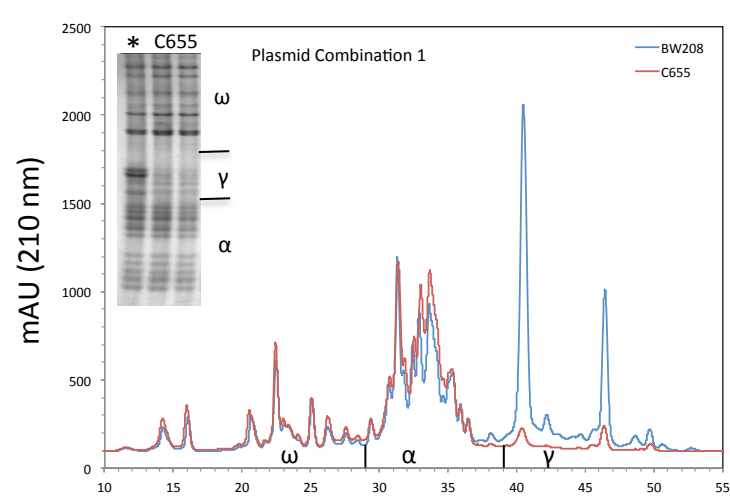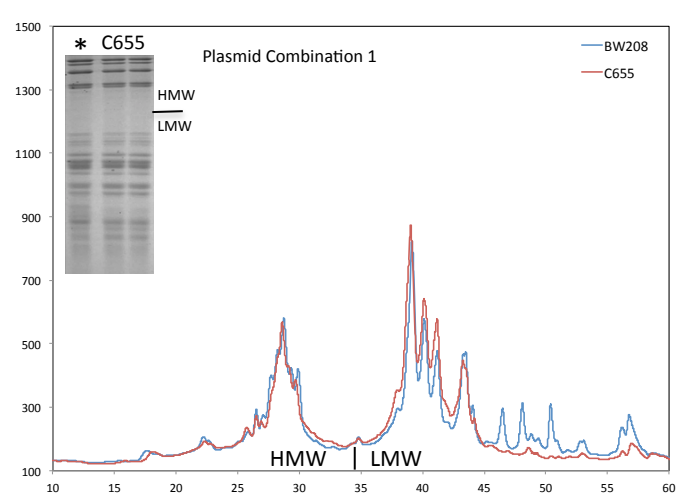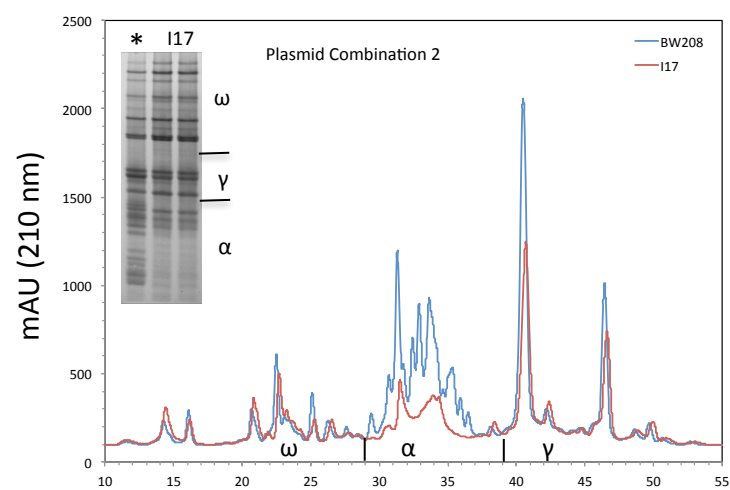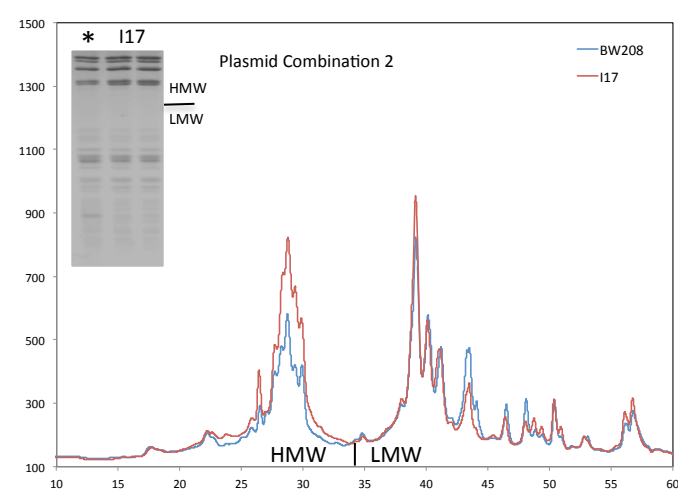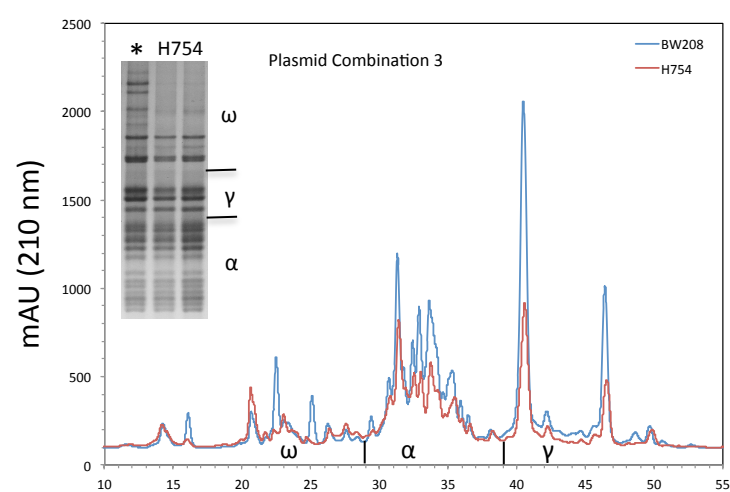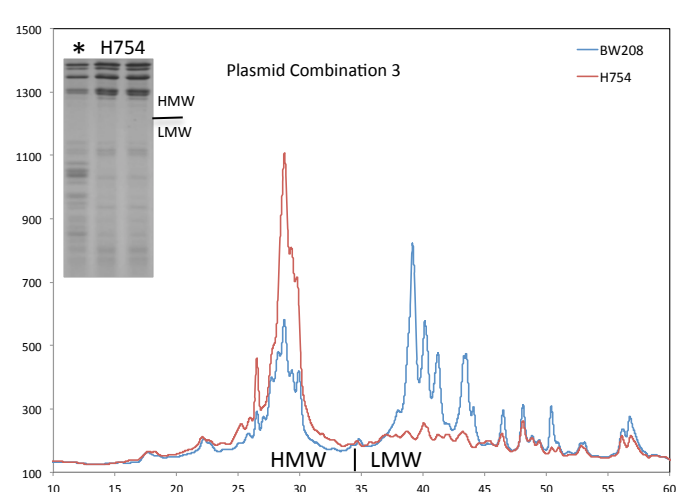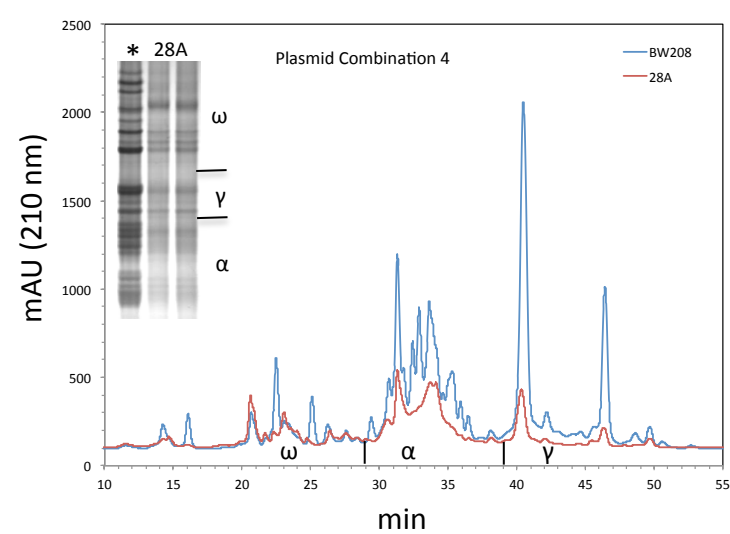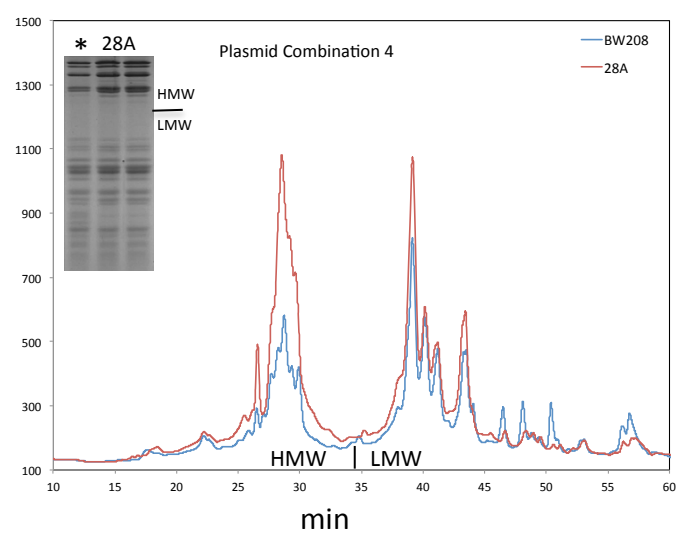

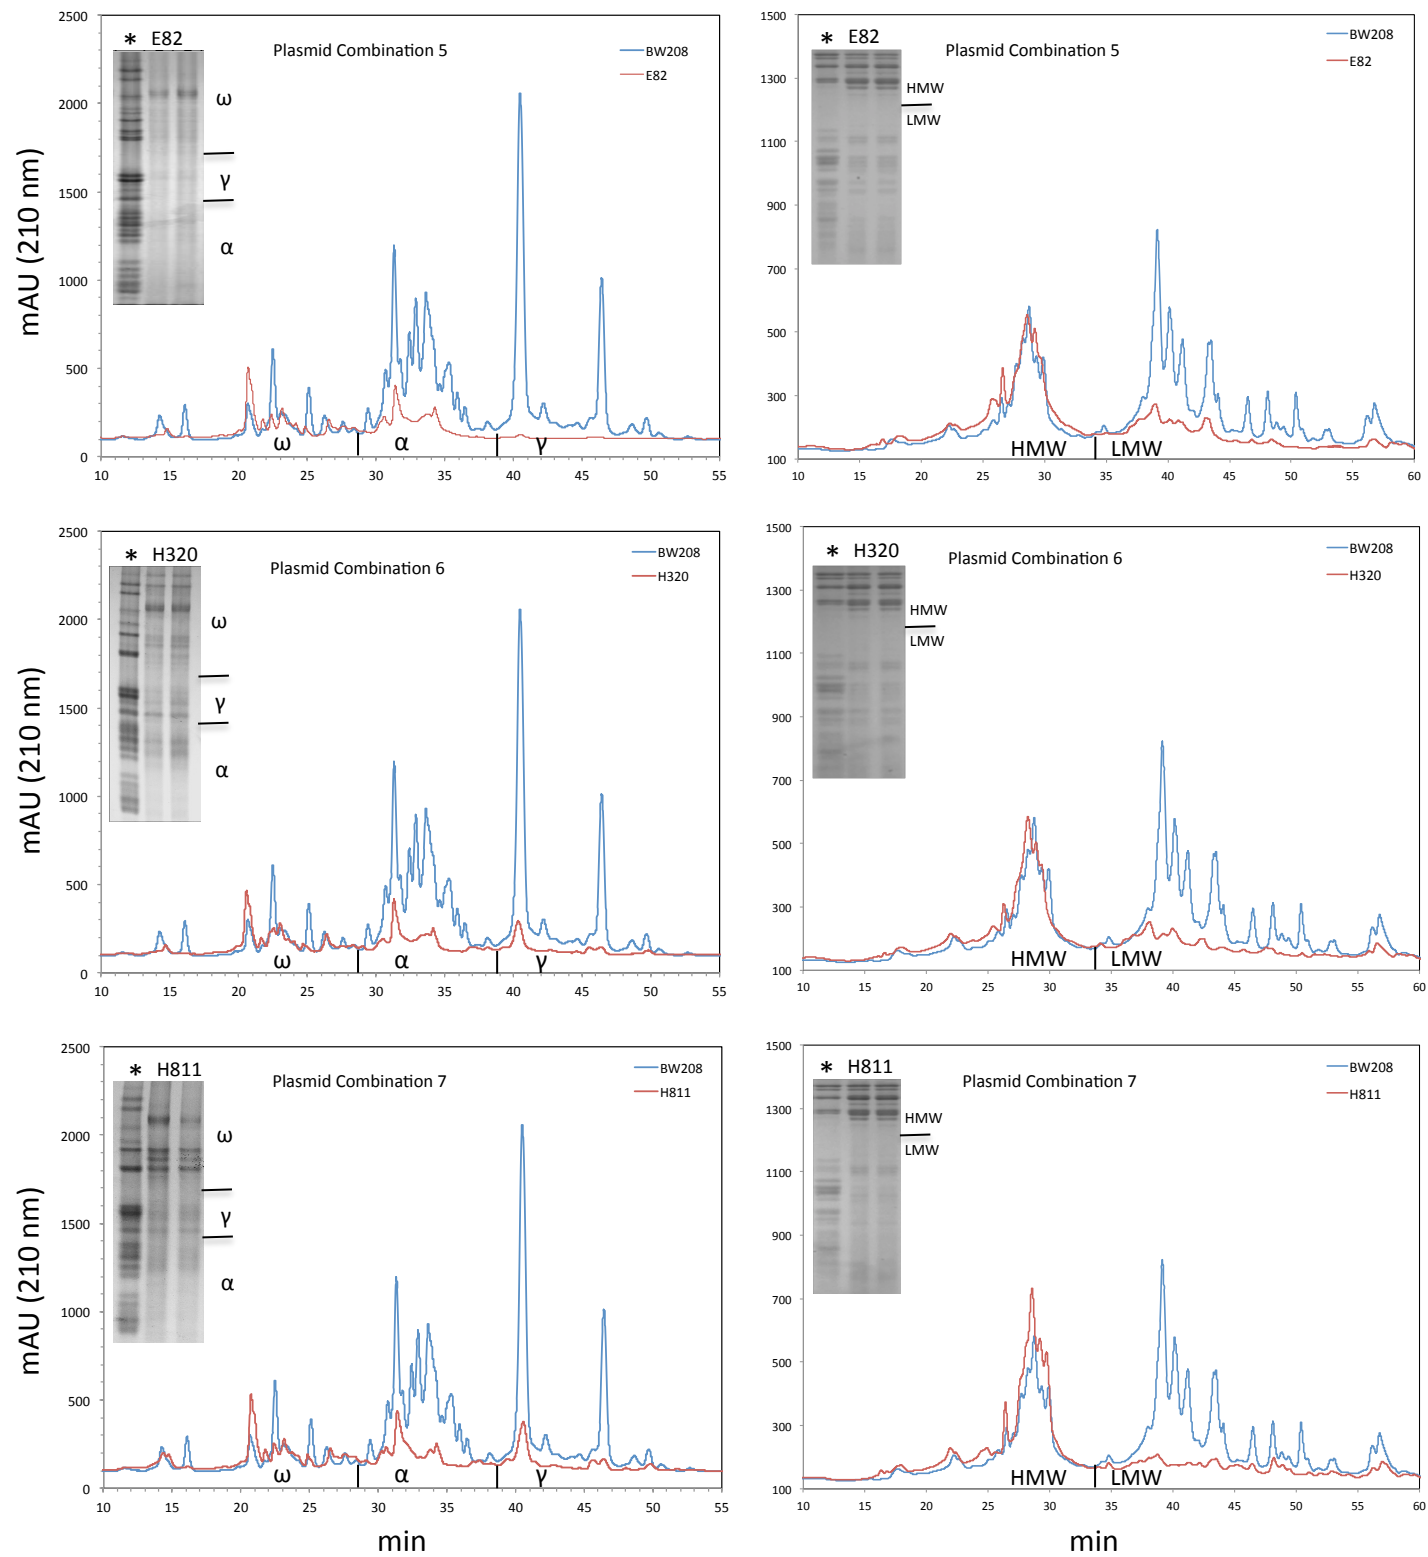

**Figure S1** Plasmid combinations and patterns of silencing. Left panels; A-PAGE and RP-HPLC chromatograms of gliadin extracts from wild type BW208 (\*, and blue line) and one transgenic line from each of the plasmid combinations;  $\alpha$ -,  $\gamma$ -, and  $\omega$ -gliadins are indicated. Right panels; SDS-PAGE and RP-HPLC chromatograms of glutenin extracts from wild type BW208 (\*, and blue line) and one transgenic line from each of the plasmid combinations; high molecular weight (HMW) and low molecular weight (LMW) glutenins are indicated. Plasmid combinations are as indicated in Figure 1c.
